# Supplementary material
Source: Springer Nature journal article supplement (https://www.springermedizin.de/resource/supplementary/12991_2010_1285_MOESM2_ESM.pdf/9613708)
Supplement: MOESM2 [file 9613708]

**1. Mood**

- I do not feel anxious or depressed
- I feel a little anxious or depressed
- I feel rather much anxious or depressed
- I feel very anxious or depressed

**2. Function Capabilities**

- I have no difficulties with my usual activities
- I have some difficulties with my usual activities
- I have rather much difficulty with my usual activities
- I have great difficulties with my usual activities

**3. Fatigue or weakness**

- I do not feel tired or weak
- I feel a little tired or weak
- I feel rather much tired or weak
- I feel very tired or weak

**4. Body weight**

- I am not overweight
- I am a little overweight
- I am rather much overweight
- I am very overweight

**5. Stiffness or tremor**

- I have no problems with stiffness or tremor
- I have some problems with stiffness or tremor
- I have rather much problems with stiffness or tremor
- I have great problems with stiffness or tremor

**6. Physical restlessness**

- I feel no bodily restlessness
- I feel some bodily restlessness
- I feel rather much bodily restlessness
- I feel very much bodily restlessness

**7. Sexual function**

- I have normal sexual lust and ability
- I have somewhat reduced sexual lust and ability
- I have very reduced sexual lust and ability
- I have no sexual lust or ability

**8. Dizziness or nausea**

- I have no problems with dizziness or nausea
- I have some problems with dizziness or nausea
- I have rather much problems with dizziness or nausea
- I have great problems with dizziness or nausea
